# Supplementary material
Source: PubMed Central journal article supplement (PMC4310646)
Supplement: ASN.2013080816_ASN2013080816SupplementaryData.pdf [file ASN.2013080816_ASN2013080816SupplementaryData.pdf]

## Supplementary table 1

**Title:** Baseline patient characteristics in subgroups of the 4<sup>th</sup> HDL cholesterol quartile

|                                                                                       | Q4a              | Q4b               |
|---------------------------------------------------------------------------------------|------------------|-------------------|
| N                                                                                     | 72               | 246               |
| Range (mg/dl)                                                                         | 47.0-50.0        | 50.1-115.5        |
| Age [years]                                                                           | 67.1 (6.8)       | 66.6 (8.2)        |
| Gender [males (%)]                                                                    | 38 (53)          | 93 (38)           |
| Ever smoking [n (%)]                                                                  | 26 (36)          | 92 (37)           |
| Body mass index [ kg/m <sup>2</sup> ]                                                 | 26.3 (3.9)       | 26.2 (4.4)        |
| Systolic blood pressure [mm Hg]                                                       | 148 (23)         | 147 (22)          |
| Diastolic blood pressure [mm Hg]                                                      | 77 (11)          | 77 (11)           |
| Time receiving dialysis [months]                                                      | 7.5 (6.0)        | 7.9 (6.8)         |
| <b>History of*</b>                                                                    |                  |                   |
| Arrhythmia [n (%)]                                                                    | 17 (24)          | 42 (17)           |
| Myocardial infarction, CABG <sup>†</sup> , PCI <sup>‡</sup> , CHD <sup>§</sup> [n(%)] | 27 (38)          | 66 (27)           |
| Congestive heart failure <sup>  </sup> [n (%)]                                        | 27 (38)          | 76 (31)           |
| Stroke or TIA <sup>#</sup> [n (%)]                                                    | 9 (13)           | 40 (16)           |
| Peripheral vascular disease [n (%)]                                                   | 34 (47)          | 106 (43)          |
| Hemoglobin [g/dl]                                                                     | 11.1 (1.3)       | 11.0 (1.4)        |
| Glycated hemoglobin [%]                                                               | 6.7 (1.2)        | 6.7 (1.2)         |
| Phosphate [mg/l]                                                                      | 6.02 (1.48)      | 6.12 (1.68)       |
| Albumin [g/dl]                                                                        | 3.84 (0.27)      | 3.80 (0.30)       |
| LDL cholesterol [mg/dl]                                                               | 131 (33)         | 129 (30)          |
| HDL cholesterol [mg/dl]                                                               | 48.3 (0.9)       | 59.4 (9.5)        |
| Apolipoprotein A1[mg/dl]                                                              | 138.6 (17.2)     | 152.8 (23.8)      |
| Apolipoprotein A2[mg/dl]                                                              | 31.2 (5.4)       | 32.6 (6.3)        |
| Apolipoprotein C3[mg/dl]                                                              | 20.2 (8.8)       | 18.7 (7.9)        |
| Triglycerides [mg/dl]                                                                 | 210 (116)        | 173 (87)          |
| C-reactive protein [mg/l, median (25 <sup>th</sup> -75 <sup>th</sup> perc.)]          | 4.4 (2.1-10.4)   | 4.6 (1.9-11.1)    |
| NT-pro-BNP [ng/l, median(25 <sup>th</sup> -75 <sup>th</sup> perc.)]                   | 2776 (1351-7587) | 4355 (1785-12337) |

**Legend:** Data shown are mean (standard deviation), if not otherwise mentioned; Q4a HDL cholesterol levels ≤50 mg/dl; Q4b HDL cholesterol levels >50 mg/dl; \*Types of disease and intervention are not mutually exclusive, <sup>†</sup> coronary artery bypass grafting surgery; <sup>‡</sup>percutaneous coronary intervention; <sup>§</sup>coronary heart disease, documented by coronary angiography; <sup>||</sup>predominantly New York Heart Association II; <sup>#</sup>transitory ischemic attack.

## Supplementary table 2

**Title:** Baseline patient characteristics according to quartiles of apolipoprotein A2 in the propensity score matched subgroup

|                                                                                               | Q1            | Q2            | Q3            | Q4            | P-value <sup>1</sup> |
|-----------------------------------------------------------------------------------------------|---------------|---------------|---------------|---------------|----------------------|
| <b>N</b>                                                                                      | 188           | 269           | 286           | 312           |                      |
| <b>Range (mg/dl)</b>                                                                          | 12.5-22.5     | 23.8-26.3     | 27.5-30.0     | 31.3-53.8     |                      |
| <b>Age [years]</b>                                                                            | 66.6 (7.8)    | 66.9 (8.6)    | 66.7 (8.1)    | 66.1 (8.8)    | 0.705                |
| <b>Gender [males (%)]</b>                                                                     | 57.5          | 53.5          | 49.7          | 51.6          | 0.394                |
| <b>Ever smoking [n (%)]</b>                                                                   | 43.6          | 40.9          | 38.1          | 36.9          | 0.632                |
| <b>Body mass index [ kg/m<sup>2</sup>]</b>                                                    | 27.5 (4.7)    | 27.8 (4.9)    | 27.5 (4.9)    | 27.4 (4.6)    | 0.734                |
| <b>Systolic blood pressure [mm Hg]</b>                                                        | 145.3 (23.6)  | 146.1 (22.7)  | 144.2 (21.1)  | 147.0 (22.5)  | 0.472                |
| <b>Diastolic blood pressure [mm Hg]</b>                                                       | 75.1 (10.8)   | 75.3 (11.2)   | 76.7 (11.3)   | 76.0 (11.1)   | 0.358                |
| <b>Time receiving dialysis [months]</b>                                                       | 18.6 (8.1)    | 17.5 (8.5)    | 17.8 (8.7)    | 18.0 (8.3)    | 0.551                |
| <b>History of*</b>                                                                            |               |               |               |               |                      |
| <b>Arrhythmia [n (%)]</b>                                                                     | 27.7          | 21.6          | 20.0          | 19.1          | 0.465                |
| <b>Myocardial infarction, CABG<sup>†</sup>,<br/>  PCI<sup>‡</sup>, CHD<sup>§</sup> [n(%)]</b> | 36.2          | 29.7          | 26.6          | 27.2          | 0.113                |
| <b>Congestive heart failure<sup>  </sup> [n (%)]</b>                                          | 40.0          | 39.4          | 31.1          | 29.8          | 0.147                |
| <b>Stroke or TIA<sup>#</sup> [n (%)]</b>                                                      | 17.6          | 19.0          | 15.7          | 18.0          | 0.788                |
| <b>Peripheral vascular disease [n (%)]</b>                                                    | 47.1          | 46.8          | 42.7          | 41.8          | 0.440                |
| <b>Hemoglobin [g/dl]</b>                                                                      | 10.6 (1.4)    | 10.9 (1.4)    | 11.0 (1.3)    | 11.2 (1.3)    | 0.186                |
| <b>Glycated hemoglobin [%]</b>                                                                | 6.7 (1.2)     | 6.7 (1.4)     | 6.7 (1.2)     | 6.6 (1.2)     | 0.539                |
| <b>Phosphate [mg/dl]</b>                                                                      | 6.0 (1.8)     | 6.0 (1.6)     | 6.0 (1.5)     | 5.9 (1.6)     | 0.977                |
| <b>Albumin [g/dl]</b>                                                                         | 3.7 (0.3)     | 3.8 (0.3)     | 3.8 (0.3)     | 3.8 (0.3)     | 0.589                |
| <b>LDL cholesterol [mg/dl]</b>                                                                | 116.5 (30.0)  | 125.1 (27.2)  | 124.0 (29.7)  | 128.3 (32.8)  | 0.001                |
| <b>HDL cholesterol [mg/dl]</b>                                                                | 28.1 (8.7)    | 32.1 (9.9)    | 36.4 (11.0)   | 44.1 (15.6)   | 0.001                |
| <b>Apolipoprotein A1[mg/dl]</b>                                                               | 105.2 (13.1)  | 115.1 (14.7)  | 127.1 (16.8)  | 147.4 (24.1)  | 0.001                |
| <b>Apolipoprotein A2[mg/dl]</b>                                                               | 20.7 (2.1)    | 25.2 (1.0)    | 28.7 (1.0)    | 35.4 (4.2)    | 0.001                |
| <b>Apolipoprotein C3[mg/dl]</b>                                                               | 17.6 (10.1)   | 20.0 (9.4)    | 20.6 (9.1)    | 22.2 (9.2)    | <0.001               |
| <b>Triglycerides [mg/dl]</b>                                                                  | 288.1 (203.6) | 276.0 (168.8) | 258.9 (154.5) | 239.7 (147.0) | 0.006                |
| <b>C-reactive protein [mg/l, median<br/>(25<sup>th</sup> -75<sup>th</sup>perc.)]</b>          | 6.8 (10.1)    | 5.9 (11.1)    | 3.8 (8.0)     | 3.5 (5.2)     | 0.245                |
| <b>NT-pro-BNP [ng/l, median (25<sup>th</sup> -<br/>75<sup>th</sup>perc.)]</b>                 | 2712 (5254)   | 2415 (5253)   | 2509 (5531)   | 2742 (5163)   | 0.458                |

**Legend:** Data shown are mean (standard deviation), if not otherwise mentioned; Q1-Q4 quartile 1-4; <sup>1</sup> P-values for comparison of groups were derived from an analysis of covariance model (for continuous variables) or logistic regression model (for categorical variables), both adjusted for age and gender. \*Types of disease and intervention are not mutually exclusive, † coronary artery bypass grafting surgery; ‡percutaneous coronary intervention; §coronary heart disease, documented by coronary angiography; ¶predominantly New York Heart Association II; #transitory ischemic attack

### Supplementary table 3

**Title:** Endpoints according to quartiles of HDL cholesterol

| <b>Combined vascular endpoint</b> | <b>n</b> | <b>first events</b> | <b>following events</b> | <b>events total</b> | <b>person-years</b> |
|-----------------------------------|----------|---------------------|-------------------------|---------------------|---------------------|
| Q1                                | 312      | 121                 | 16                      | 137                 | 876                 |
| Q2                                | 308      | 117                 | 16                      | 133                 | 851                 |
| Q3                                | 317      | 108                 | 20                      | 128                 | 917                 |
| Q4                                | 318      | 123                 | 27                      | 150                 | 910                 |
| <b>Total</b>                      | 1255     | 469                 | 79                      | 548                 | 3554                |

  

| <b>Cardiac death</b> | <b>n</b> | <b>first events</b> | <b>following events</b> | <b>events total</b> | <b>person-years</b> |
|----------------------|----------|---------------------|-------------------------|---------------------|---------------------|
| Q1                   | 312      | 75                  | 0                       | 75                  | 876                 |
| Q2                   | 308      | 67                  | 0                       | 67                  | 851                 |
| Q3                   | 317      | 55                  | 0                       | 55                  | 917                 |
| Q4                   | 318      | 73                  | 0                       | 73                  | 910                 |
| <b>Total</b>         | 1255     | 270                 | 0                       | 270                 | 3554                |

  

| <b>Sudden cardiac death</b> | <b>n</b> | <b>first events</b> | <b>following events</b> | <b>events total</b> | <b>person-years</b> |
|-----------------------------|----------|---------------------|-------------------------|---------------------|---------------------|
| Q1                          | 312      | 43                  | 0                       | 43                  | 876                 |
| Q2                          | 308      | 38                  | 0                       | 38                  | 851                 |
| Q3                          | 317      | 32                  | 0                       | 32                  | 917                 |
| Q4                          | 318      | 47                  | 0                       | 47                  | 910                 |
| <b>Total</b>                | 1255     | 160                 | 0                       | 160                 | 3554                |

  

| <b>Non-fatal MI</b> | <b>n</b> | <b>first events</b> | <b>following events</b> | <b>events total</b> | <b>person-years</b> |
|---------------------|----------|---------------------|-------------------------|---------------------|---------------------|
| Q1                  | 312      | 37                  | 1                       | 38                  | 876                 |
| Q2                  | 308      | 38                  | 4                       | 42                  | 851                 |
| Q3                  | 317      | 37                  | 6                       | 43                  | 917                 |
| Q4                  | 318      | 37                  | 6                       | 43                  | 910                 |
| <b>Total</b>        | 1255     | 149                 | 17                      | 166                 | 3554                |

  

| <b>All cardiac events</b> | <b>n</b> | <b>first events</b> | <b>following events</b> | <b>events total</b> | <b>person-years</b> |
|---------------------------|----------|---------------------|-------------------------|---------------------|---------------------|
| Q1                        | 312      | 118                 | 27                      | 145                 | 876                 |
| Q2                        | 308      | 121                 | 38                      | 159                 | 851                 |
| Q3                        | 317      | 99                  | 31                      | 130                 | 917                 |
| Q4                        | 318      | 113                 | 38                      | 151                 | 910                 |
| <b>Total</b>              | 1255     | 451                 | 134                     | 585                 | 3554                |

  

| <b>All cerebrovascular events</b> | <b>n</b> | <b>first events</b> | <b>following events</b> | <b>events total</b> | <b>person-years</b> |
|-----------------------------------|----------|---------------------|-------------------------|---------------------|---------------------|
| Q1                                | 312      | 35                  | 5                       | 40                  | 876                 |
| Q2                                | 308      | 35                  | 5                       | 40                  | 851                 |

|              |      |     |    |     |      |
|--------------|------|-----|----|-----|------|
| <b>Q3</b>    | 317  | 40  | 8  | 48  | 917  |
| <b>Q4</b>    | 318  | 39  | 9  | 48  | 910  |
| <b>Total</b> | 1255 | 149 | 27 | 176 | 3554 |

| <b>Death from all causes</b> | <b>n</b> | <b>first events</b> | <b>following events</b> | <b>events total</b> | <b>person-years</b> |
|------------------------------|----------|---------------------|-------------------------|---------------------|---------------------|
| <b>Q1</b>                    | 312      | 167                 | 0                       | 167                 | 876                 |
| <b>Q2</b>                    | 308      | 149                 | 0                       | 149                 | 851                 |
| <b>Q3</b>                    | 317      | 137                 | 0                       | 137                 | 917                 |
| <b>Q4</b>                    | 318      | 164                 | 0                       | 164                 | 910                 |
| <b>Total</b>                 | 1255     | 617                 | 0                       | 617                 | 3554                |

**Legend:** Q1-Q4 quartile 1-4

## Supplementary table 4

**Title:** Endpoints according to quartiles of apolipoprotein A1

| <b>Combined vascular endpoint</b> | <b>n</b> | <b>first events</b> | <b>following events</b> | <b>events total</b> | <b>person-years</b> |
|-----------------------------------|----------|---------------------|-------------------------|---------------------|---------------------|
| <b>Q1</b>                         | 312      | 123                 | 15                      | 138                 | 833                 |
| <b>Q2</b>                         | 311      | 126                 | 19                      | 145                 | 861                 |
| <b>Q3</b>                         | 305      | 101                 | 22                      | 123                 | 881                 |
| <b>Q4</b>                         | 327      | 119                 | 23                      | 142                 | 979                 |
| <b>Total</b>                      | 1255     | 469                 | 79                      | 548                 | 3554                |

| <b>Cardiac death</b> | <b>n</b> | <b>first events</b> | <b>following events</b> | <b>events total</b> | <b>person-years</b> |
|----------------------|----------|---------------------|-------------------------|---------------------|---------------------|
| <b>Q1</b>            | 312      | 71                  | 0                       | 71                  | 833                 |
| <b>Q2</b>            | 311      | 74                  | 0                       | 74                  | 861                 |
| <b>Q3</b>            | 305      | 60                  | 0                       | 60                  | 881                 |
| <b>Q4</b>            | 327      | 65                  | 0                       | 65                  | 979                 |
| <b>Total</b>         | 1255     | 270                 | 0                       | 270                 | 3554                |

| <b>Sudden cardiac death</b> | <b>n</b> | <b>first events</b> | <b>following events</b> | <b>events total</b> | <b>person-years</b> |
|-----------------------------|----------|---------------------|-------------------------|---------------------|---------------------|
| <b>Q1</b>                   | 312      | 46                  | 0                       | 46                  | 833                 |
| <b>Q2</b>                   | 311      | 35                  | 0                       | 35                  | 861                 |
| <b>Q3</b>                   | 305      | 38                  | 0                       | 38                  | 881                 |
| <b>Q4</b>                   | 327      | 41                  | 0                       | 41                  | 979                 |
| <b>Total</b>                | 1255     | 160                 | 0                       | 160                 | 3554                |

| <b>Non-fatal MI</b> | <b>n</b> | <b>first events</b> | <b>following events</b> | <b>events total</b> | <b>person-years</b> |
|---------------------|----------|---------------------|-------------------------|---------------------|---------------------|
| <b>Q1</b>           | 312      | 36                  | 4                       | 40                  | 833                 |
| <b>Q2</b>           | 311      | 41                  | 2                       | 43                  | 861                 |
| <b>Q3</b>           | 305      | 33                  | 6                       | 39                  | 881                 |
| <b>Q4</b>           | 327      | 39                  | 5                       | 44                  | 979                 |
| <b>Total</b>        | 1255     | 149                 | 17                      | 166                 | 3554                |

| <b>All cardiac events</b> | <b>n</b> | <b>first events</b> | <b>following events</b> | <b>events total</b> | <b>person-years</b> |
|---------------------------|----------|---------------------|-------------------------|---------------------|---------------------|
| <b>Q1</b>                 | 312      | 113                 | 26                      | 139                 | 833                 |
| <b>Q2</b>                 | 311      | 126                 | 47                      | 173                 | 861                 |
| <b>Q3</b>                 | 305      | 104                 | 29                      | 133                 | 881                 |
| <b>Q4</b>                 | 327      | 108                 | 32                      | 140                 | 979                 |
| <b>Total</b>              | 1255     | 451                 | 134                     | 585                 | 3554                |

| <b>All cerebrovascular events</b> | <b>n</b> | <b>first events</b> | <b>following events</b> | <b>events total</b> | <b>person-years</b> |
|-----------------------------------|----------|---------------------|-------------------------|---------------------|---------------------|
| <b>Q1</b>                         | 312      | 39                  | 5                       | 44                  | 833                 |
| <b>Q2</b>                         | 311      | 35                  | 7                       | 42                  | 861                 |

|              |      |     |    |     |      |
|--------------|------|-----|----|-----|------|
| <b>Q3</b>    | 305  | 32  | 5  | 37  | 881  |
| <b>Q4</b>    | 327  | 43  | 10 | 53  | 979  |
| <b>Total</b> | 1255 | 149 | 27 | 176 | 3554 |

| <b>Death from all causes</b> | <b>n</b> | <b>first events</b> | <b>following events</b> | <b>events total</b> | <b>person-years</b> |
|------------------------------|----------|---------------------|-------------------------|---------------------|---------------------|
| <b>Q1</b>                    | 312      | 166                 | 0                       | 166                 | 833                 |
| <b>Q2</b>                    | 311      | 149                 | 0                       | 149                 | 861                 |
| <b>Q3</b>                    | 305      | 149                 | 0                       | 149                 | 881                 |
| <b>Q4</b>                    | 327      | 153                 | 0                       | 153                 | 979                 |
| <b>Total</b>                 | 1255     | 617                 | 0                       | 617                 | 3554                |

**Legend:** Q1-Q4 quartile 1-4

## Supplementary table 5

**Title:** Endpoints according to quartiles of apolipoprotein A2

| <b>Combined vascular endpoint</b> | <b>n</b> | <b>first events</b> | <b>following events</b> | <b>events total</b> | <b>person-years</b> |
|-----------------------------------|----------|---------------------|-------------------------|---------------------|---------------------|
| Q1                                | 232      | 111                 | 12                      | 123                 | 602                 |
| Q2                                | 314      | 109                 | 22                      | 131                 | 882                 |
| Q3                                | 338      | 130                 | 24                      | 154                 | 948                 |
| Q4                                | 367      | 119                 | 21                      | 140                 | 1107                |
| <b>Total</b>                      | 1251     | 469                 | 79                      | 548                 | 3539                |

| <b>Cardiac death</b> | <b>n</b> | <b>first events</b> | <b>following events</b> | <b>events total</b> | <b>person-years</b> |
|----------------------|----------|---------------------|-------------------------|---------------------|---------------------|
| Q1                   | 232      | 67                  | 0                       | 67                  | 602                 |
| Q2                   | 314      | 69                  | 0                       | 69                  | 882                 |
| Q3                   | 338      | 72                  | 0                       | 72                  | 948                 |
| Q4                   | 367      | 62                  | 0                       | 62                  | 1107                |
| <b>Total</b>         | 1251     | 270                 | 0                       | 270                 | 3539                |

| <b>Sudden cardiac death</b> | <b>n</b> | <b>first events</b> | <b>following events</b> | <b>events total</b> | <b>person-years</b> |
|-----------------------------|----------|---------------------|-------------------------|---------------------|---------------------|
| Q1                          | 232      | 46                  | 0                       | 46                  | 602                 |
| Q2                          | 314      | 37                  | 0                       | 37                  | 882                 |
| Q3                          | 338      | 39                  | 0                       | 39                  | 948                 |
| Q4                          | 367      | 38                  | 0                       | 38                  | 1107                |
| <b>Total</b>                | 1251     | 160                 | 0                       | 160                 | 3539                |

| <b>Non-fatal MI</b> | <b>n</b> | <b>first events</b> | <b>following events</b> | <b>events total</b> | <b>person-years</b> |
|---------------------|----------|---------------------|-------------------------|---------------------|---------------------|
| Q1                  | 232      | 29                  | 3                       | 32                  | 602                 |
| Q2                  | 314      | 35                  | 2                       | 37                  | 882                 |
| Q3                  | 338      | 43                  | 8                       | 51                  | 948                 |
| Q4                  | 367      | 42                  | 4                       | 46                  | 1107                |
| <b>Total</b>        | 1251     | 149                 | 17                      | 166                 | 3539                |

| <b>All cardiac events</b> | <b>n</b> | <b>first events</b> | <b>following events</b> | <b>events total</b> | <b>person-years</b> |
|---------------------------|----------|---------------------|-------------------------|---------------------|---------------------|
| Q1                        | 232      | 101                 | 25                      | 126                 | 602                 |
| Q2                        | 314      | 113                 | 33                      | 146                 | 882                 |
| Q3                        | 338      | 121                 | 42                      | 163                 | 948                 |
| Q4                        | 367      | 115                 | 34                      | 149                 | 1107                |
| <b>Total</b>              | 1251     | 450                 | 134                     | 584                 | 3539                |

| <b>All cerebrovascular events</b> | <b>n</b> | <b>first events</b> | <b>following events</b> | <b>events total</b> | <b>person-years</b> |
|-----------------------------------|----------|---------------------|-------------------------|---------------------|---------------------|
| Q1                                | 232      | 32                  | 4                       | 36                  | 602                 |
| Q2                                | 314      | 39                  | 9                       | 48                  | 882                 |

|              |      |     |    |     |      |
|--------------|------|-----|----|-----|------|
| <b>Q3</b>    | 338  | 35  | 6  | 41  | 948  |
| <b>Q4</b>    | 367  | 43  | 8  | 51  | 1107 |
| <b>Total</b> | 1251 | 149 | 27 | 176 | 3539 |

| <b>Death from all causes</b> | <b>n</b> | <b>first events</b> | <b>following events</b> | <b>events total</b> | <b>person-years</b> |
|------------------------------|----------|---------------------|-------------------------|---------------------|---------------------|
| <b>Q1</b>                    | 232      | 156                 | 0                       | 156                 | 602                 |
| <b>Q2</b>                    | 314      | 163                 | 0                       | 163                 | 882                 |
| <b>Q3</b>                    | 338      | 153                 | 0                       | 153                 | 948                 |
| <b>Q4</b>                    | 367      | 144                 | 0                       | 144                 | 1107                |
| <b>Total</b>                 | 1251     | 616                 | 0                       | 616                 | 3539                |

**Legend:** Q1-Q4 quartile 1-4

## Supplementary table 6

**Title:** Endpoints according to quartiles of apolipoprotein C3

| <b>Combined vascular endpoint</b> | <b>n</b> | <b>first events</b> | <b>following events</b> | <b>events total</b> | <b>person-years</b> |
|-----------------------------------|----------|---------------------|-------------------------|---------------------|---------------------|
| <b>Q1</b>                         | 321      | 123                 | 16                      | 139                 | 884                 |
| <b>Q2</b>                         | 306      | 112                 | 17                      | 129                 | 847                 |
| <b>Q3</b>                         | 307      | 119                 | 24                      | 143                 | 882                 |
| <b>Q4</b>                         | 321      | 115                 | 22                      | 137                 | 941                 |
| <b>Total</b>                      | 1255     | 469                 | 79                      | 548                 | 3554                |

| <b>Cardiac death</b> | <b>n</b> | <b>first events</b> | <b>following events</b> | <b>events total</b> | <b>person-years</b> |
|----------------------|----------|---------------------|-------------------------|---------------------|---------------------|
| <b>Q1</b>            | 321      | 67                  | 0                       | 67                  | 884                 |
| <b>Q2</b>            | 306      | 63                  | 0                       | 63                  | 847                 |
| <b>Q3</b>            | 307      | 82                  | 0                       | 82                  | 882                 |
| <b>Q4</b>            | 321      | 58                  | 0                       | 58                  | 941                 |
| <b>Total</b>         | 1255     | 270                 | 0                       | 270                 | 3554                |

| <b>Sudden cardiac death</b> | <b>n</b> | <b>first events</b> | <b>following events</b> | <b>events total</b> | <b>person-years</b> |
|-----------------------------|----------|---------------------|-------------------------|---------------------|---------------------|
| <b>Q1</b>                   | 321      | 40                  | 0                       | 40                  | 884                 |
| <b>Q2</b>                   | 306      | 36                  | 0                       | 36                  | 847                 |
| <b>Q3</b>                   | 307      | 49                  | 0                       | 49                  | 882                 |
| <b>Q4</b>                   | 321      | 35                  | 0                       | 35                  | 941                 |
| <b>Total</b>                | 1255     | 160                 | 0                       | 160                 | 3554                |

| <b>Non-fatal MI</b> | <b>n</b> | <b>first events</b> | <b>following events</b> | <b>events total</b> | <b>person-years</b> |
|---------------------|----------|---------------------|-------------------------|---------------------|---------------------|
| <b>Q1</b>           | 321      | 35                  | 3                       | 38                  | 884                 |
| <b>Q2</b>           | 306      | 32                  | 3                       | 35                  | 847                 |
| <b>Q3</b>           | 307      | 36                  | 5                       | 41                  | 882                 |
| <b>Q4</b>           | 321      | 46                  | 6                       | 52                  | 941                 |
| <b>Total</b>        | 1255     | 149                 | 17                      | 166                 | 3554                |

| <b>All cardiac events</b> | <b>n</b> | <b>first events</b> | <b>following events</b> | <b>events total</b> | <b>person-years</b> |
|---------------------------|----------|---------------------|-------------------------|---------------------|---------------------|
| <b>Q1</b>                 | 321      | 111                 | 36                      | 147                 | 884                 |
| <b>Q2</b>                 | 306      | 98                  | 28                      | 126                 | 847                 |
| <b>Q3</b>                 | 307      | 126                 | 37                      | 163                 | 882                 |
| <b>Q4</b>                 | 321      | 116                 | 33                      | 149                 | 941                 |
| <b>Total</b>              | 1255     | 451                 | 134                     | 585                 | 3554                |

| <b>All cerebrovascular events</b> | <b>n</b> | <b>first events</b> | <b>following events</b> | <b>events total</b> | <b>person-years</b> |
|-----------------------------------|----------|---------------------|-------------------------|---------------------|---------------------|
| <b>Q1</b>                         | 321      | 41                  | 10                      | 51                  | 884                 |
| <b>Q2</b>                         | 306      | 42                  | 4                       | 46                  | 847                 |

|              |      |     |    |     |      |
|--------------|------|-----|----|-----|------|
| <b>Q3</b>    | 307  | 30  | 7  | 37  | 882  |
| <b>Q4</b>    | 321  | 36  | 6  | 42  | 941  |
| <b>Total</b> | 1255 | 149 | 27 | 176 | 3554 |

| <b>Death from all causes</b> | <b>n</b> | <b>first events</b> | <b>following events</b> | <b>events total</b> | <b>person-years</b> |
|------------------------------|----------|---------------------|-------------------------|---------------------|---------------------|
| <b>Q1</b>                    | 321      | 171                 | 0                       | 171                 | 884                 |
| <b>Q2</b>                    | 306      | 146                 | 0                       | 146                 | 847                 |
| <b>Q3</b>                    | 307      | 164                 | 0                       | 164                 | 882                 |
| <b>Q4</b>                    | 321      | 136                 | 0                       | 136                 | 941                 |
| <b>Total</b>                 | 1255     | 617                 | 0                       | 617                 | 3554                |

**Legend:** Q1-Q4 quartile 1-4

## Supplementary table 7

**Title:** Prognostic value of HDL cholesterol on risk of endpoint occurrence in subgroups of the 4<sup>th</sup> HDL cholesterol quartile

| Endpoint                       | Quartile | HR <sup>1</sup> (95% CI) | P-value <sup>2</sup> |
|--------------------------------|----------|--------------------------|----------------------|
| Combined vascular endpoint     | Q4a      | 1.18 (0.81-1.70)         | 0.389                |
|                                | Q4b      | 1.02 (0.79-1.33)         | 0.876                |
| Cardiac death                  | Q4a      | 0.72 (0.38-1.36)         | 0.306                |
|                                | Q4b      | 1.21 (0.84-1.72)         | 0.305                |
| Sudden cardiac death           | Q4a      | 0.61 (0.26-1.44)         | 0.259                |
|                                | Q4b      | 1.20 (0.76-1.88)         | 0.439                |
| Nonfatal myocardial infarction | Q4a      | 1.65 (0.89-3.07)         | 0.114                |
|                                | Q4b      | 1.00 (0.60-1.65)         | 0.990                |
| All cardiac events             | Q4a      | 1.22 (0.85-1.75)         | 0.272                |
|                                | Q4b      | 1.10 (0.85-1.43)         | 0.452                |
| All cerebrovascular events     | Q4a      | 0.98 (0.63-1.52)         | 0.914                |
|                                | Q4b      | 1.05 (0.68-1.62)         | 0.819                |
| Death from all causes          | Q4a      | 1.10 (0.76-1.59)         | 0.619                |
|                                | Q4b      | 0.98 (0.76-1.26)         | 0.871                |

**Legend:** <sup>1</sup> hazard ratio vs. quartile 1; <sup>2</sup>P-value calculated with Wald test; Q4a HDL cholesterol levels  $\leq 50$  mg/dl; Q4b HDL cholesterol levels  $> 50$  mg/dl.

## Supplementary table 8

**Title:** Associations of HDL cholesterol with endpoints adjusted for longitudinal measurements

| <b>Endpoint</b>                       | <b>Quartile</b> | <b>HR<sup>1</sup> (95% CI)</b> | <b>P-value<sup>2</sup></b> |
|---------------------------------------|-----------------|--------------------------------|----------------------------|
| <b>Combined vascular endpoint</b>     | <b>Q2</b>       | 1.00 (0.79-1.28)               | 0.982                      |
|                                       | <b>Q3</b>       | 1.02 (0.86-1.36)               | 0.874                      |
|                                       | <b>Q4</b>       | 1.10 (0.81-1.31)               | 0.312                      |
|                                       | <b>Q4a</b>      | 1.18 (0.81-1.70)               | 0.389                      |
|                                       | <b>Q4b</b>      | 1.02 (0.79-1.33)               | 0.876                      |
|                                       | <b>Overall</b>  |                                | 0.865                      |
| <b>Cardiac death</b>                  | <b>Q2</b>       | 0.98 (0.70-1.38)               | 0.910                      |
|                                       | <b>Q3</b>       | 0.87 (0.60-1.19)               | 0.447                      |
|                                       | <b>Q4</b>       | 1.06 (0.75-1.49)               | 0.748                      |
|                                       | <b>Q4a</b>      | 0.78 (0.44-1.42)               | 0.694                      |
|                                       | <b>Q4b</b>      | 1.12 (0.75-1.63)               | 0.227                      |
|                                       | <b>Overall</b>  |                                | 0.601                      |
| <b>Sudden cardiac death</b>           | <b>Q2</b>       | 1.15 (0.74-1.79)               | 0.540                      |
|                                       | <b>Q3</b>       | 0.88 (0.41-1.90)               | 0.105                      |
|                                       | <b>Q4</b>       | 1.33 (1.06-1.66)               | 0.219                      |
|                                       | <b>Q4a</b>      | 0.66 (0.31-1.49)               | 0.413                      |
|                                       | <b>Q4b</b>      | 1.27 (0.83-1.95)               | 0.356                      |
|                                       | <b>Overall</b>  |                                | 0.389                      |
| <b>Nonfatal myocardial infarction</b> | <b>Q2</b>       | 0.99 (0.79-1.24)               | 0.507                      |
|                                       | <b>Q3</b>       | 1.05 (0.83-1.32)               | 0.846                      |
|                                       | <b>Q4</b>       | 1.18 (0.77-1.81)               | 0.444                      |
|                                       | <b>Q4a</b>      | 1.56 (0.51-1.56)               | 0.179                      |
|                                       | <b>Q4b</b>      | 1.06 (0.66-1.71)               | 0.843                      |
|                                       | <b>Overall</b>  |                                | 0.632                      |
| <b>All cardiac events</b>             | <b>Q2</b>       | 0.92 (0.73-1.16)               | 0.497                      |
|                                       | <b>Q3</b>       | 1.15 (0.92-1.45)               | 0.220                      |
|                                       | <b>Q4</b>       | 1.04 (0.82-1.32)               | 0.738                      |
|                                       | <b>Q4a</b>      | 1.15 (0.78-1.68)               | 0.251                      |
|                                       | <b>Q4b</b>      | 1.19 (0.94-1.52)               | 0.573                      |
|                                       | <b>Overall</b>  |                                | 0.307                      |
| <b>All cerebrovascular events</b>     | <b>Q2</b>       | 0.96 (0.64-1.53)               | 0.945                      |
|                                       | <b>Q3</b>       | 1.11 (1.05-1.15)               | 0.789                      |
|                                       | <b>Q4</b>       | 1.19 (0.85-1.66)               | 0.698                      |
|                                       | <b>Q4a</b>      | 1.63 (0.58-1.63)               | 0.111                      |
|                                       | <b>Q4b</b>      | 1.10 (0.70-1.75)               | 0.873                      |
|                                       | <b>Overall</b>  |                                | 0.896                      |
| <b>Death from all causes</b>          | <b>Q2</b>       | 1.05 (0.85-1.32)               | 0.636                      |
|                                       | <b>Q3</b>       | 1.14 (0.91-1.43)               | 0.251                      |

|                |                  |       |
|----------------|------------------|-------|
| <b>Q4</b>      | 1.02 (0.81-1.28) | 0.885 |
| <b>Q4a</b>     | 1.20 (0.86-1.69) | 0.723 |
| <b>Q4b</b>     | 0.91 (0.69-1.19) | 0.652 |
| <b>Overall</b> |                  | 0.668 |

---

**Legend:** <sup>1</sup>HR hazard ratio vs. quartile 1; <sup>2</sup>P-value of global test; Q4a HDL cholesterol levels  $\leq 50$  mg/dl; Q4b HDL cholesterol levels  $> 50$  mg/dl.

## Supplementary table 9

**Title:** Endpoints according to quartiles of ApoA2 in the propensity score matched subgroup

| <b>Endpoint</b>                       | <b>n</b> | <b>events</b> | <b>Quartile<sup>1</sup></b> | <b>HR<sup>2</sup> (95% CI)</b> | <b>P-value<sup>3</sup></b> |
|---------------------------------------|----------|---------------|-----------------------------|--------------------------------|----------------------------|
| <b>Combined vascular endpoint</b>     | 188      | 100           | Q1                          | 1.00                           |                            |
|                                       | 269      | 109           | Q2                          | 0.71 (0.52-0.97)               | 0.034                      |
|                                       | 286      | 129           | Q3                          | 0.90 (0.67-1.20)               | 0.467                      |
|                                       | 312      | 114           | Q4                          | 0.71 (0.50-0.99)               | 0.046                      |
|                                       |          |               | Overall                     | -                              | 0.086                      |
| <b>Cardiac death</b>                  | 188      | 55            | Q1                          | 1.00                           |                            |
|                                       | 269      | 57            | Q2                          | 0.71 (0.46-1.09)               | 0.120                      |
|                                       | 286      | 59            | Q3                          | 0.81 (0.55-1.20)               | 0.293                      |
|                                       | 320      | 52            | Q4                          | 0.64 (0.40-1.01)               | 0.053                      |
|                                       |          |               | Overall                     | -                              | 0.234                      |
| <b>Sudden cardiac death</b>           | 188      | 38            | Q1                          | 1.00                           |                            |
|                                       | 269      | 32            | Q2                          | 0.54 (0.31-0.92)               | 0.022                      |
|                                       | 286      | 33            | Q3                          | 0.61 (0.40-0.94)               | 0.024                      |
|                                       | 312      | 34            | Q4                          | 0.58 (0.34-0.99)               | 0.046                      |
|                                       |          |               | Overall                     | -                              | 0.065                      |
| <b>Nonfatal myocardial infarction</b> | 188      | 31            | Q1                          | 1.00                           |                            |
|                                       | 269      | 31            | Q2                          | 0.62 (0.37-1.03)               | 0.066                      |
|                                       | 286      | 45            | Q3                          | 0.92 (0.58-1.46)               | 0.722                      |
|                                       | 312      | 34            | Q4                          | 0.60 (0.35-1.06)               | 0.080                      |
|                                       |          |               | Overall                     | -                              | 0.104                      |
| <b>All cardiac events</b>             | 188      | 109           | Q1                          | 1.00                           |                            |
|                                       | 269      | 119           | Q2                          | 0.71 (0.54-0.94)               | 0.020                      |
|                                       | 286      | 140           | Q3                          | 0.92 (0.71-1.18)               | 0.493                      |
|                                       | 312      | 121           | Q4                          | 0.70 (0.50-0.96)               | 0.029                      |
|                                       |          |               | Overall                     | -                              | 0.053                      |
| <b>All cerebrovascular events</b>     | 188      | 23            | Q1                          | 1.00                           |                            |
|                                       | 269      | 43            | Q2                          | 1.08 (0.64-1.82)               | 0.782                      |
|                                       | 286      | 34            | Q3                          | 0.77 (0.41-1.43)               | 0.406                      |
|                                       | 312      | 42            | Q4                          | 0.87 (0.52-1.46)               | 0.604                      |
|                                       |          |               | Overall                     | -                              | 0.632                      |
| <b>Death from all causes</b>          | 188      | 123           | Q1                          | 1.00                           |                            |
|                                       | 269      | 130           | Q2                          | 0.79 (0.61-1.03)               | 0.086                      |
|                                       | 286      | 119           | Q3                          | 0.78 (0.59-1.03)               | 0.076                      |
|                                       | 312      | 115           | Q4                          | 0.71 (0.52-0.96)               | 0.027                      |
|                                       |          |               | Overall                     | -                              | 0.139                      |

**Legend:** <sup>1</sup> Q1-Q4 quartile 1-4, <sup>2</sup> HR hazard ratio vs. quartile 1; <sup>3</sup> P-value of global test;
